# Supplementary material for: Design and Optimization of Orally Administered Luteolin Nanoethosomes to Enhance Its Anti-Tumor Activity against Hepatocellular Carcinoma
Source: MDPI journal article supplement (doi:10.3390/pharmaceutics13050648), 2021-05-02
Supplement: s1 [file s1]

# Supplementary Materials: Design and Optimization of Orally Administered Luteolin Nanoethosomes to Enhance Its Anti-Tumor Activity against Hepatocellular Carcinoma

Mahmoud M. A. Elsayed, Tarek M. Okda, Gamal M. K. Atwa, Gamal A. Omran, Atef E. Abd Elbaky and Abd Elhakim Ramadan

**Table S1.** The accuracy of the used spectrophotometric procedure.

| Scheme | LUT                             |                                 |                         |
|--------|---------------------------------|---------------------------------|-------------------------|
|        | Taken ( $\mu\text{g mL}^{-1}$ ) | Found ( $\mu\text{g mL}^{-1}$ ) | % recovery <sup>a</sup> |
| 1      | 2                               | 2.002                           | 100.1                   |
| 2      | 4                               | 3.98                            | 99.5                    |
| 3      | 8                               | 7.97                            | 99.5                    |
| 4      | 12                              | 11.916                          | 99.3                    |
| 5      | 16                              | 15.84                           | 99                      |
| Mean   |                                 | 99.48                           |                         |
| SD     |                                 | 0.40                            |                         |
| RSD    |                                 | 0.40                            |                         |
| RE     |                                 | 0.52                            |                         |

SD: Standard deviation, RSD: Relative Standard deviation; RE: Relative error; a: mean of three replicate measurements.

**Table S2.** The intraday and interday precision profile.

| Precision level | LUT                             |                         |            |      |
|-----------------|---------------------------------|-------------------------|------------|------|
|                 | Conc. ( $\mu\text{g mL}^{-1}$ ) | % Recovery <sup>a</sup> | $\pm$ SD   | RSD  |
| Intraday        | 2                               | 99.9                    | $\pm$ 0.21 | 0.21 |
|                 | 8                               | 99.7                    | $\pm$ 0.12 | 0.12 |
|                 | 16                              | 99.9                    | $\pm$ 0.98 | 0.98 |
| Interday        | 2                               | 100                     | $\pm$ 0.83 | 0.83 |
|                 | 8                               | 99.5                    | $\pm$ 0.21 | 0.21 |
|                 | 16                              | 100.5                   | $\pm$ 1.24 | 1.24 |

SD: Standard deviation; RSD: relative standard deviation; a: Mean of three replicate measurements.

**Table S3.** The calculated correlation coefficient for the in vitro release of LUT from the prepared ethosomes.

| Formula No. | The Correlation Coefficient (r) |          |          |           |                   |
|-------------|---------------------------------|----------|----------|-----------|-------------------|
|             | Zero                            | First    | Second   | Diffusion | Best Fitted Order |
| F1          | 0.746577                        | 0.799826 | 0.844784 | 0.859448  | Diffusion         |
| F2          | 0.716695                        | 0.778696 | 0.826013 | 0.83558   | Diffusion         |
| F3          | 0.714786                        | 0.780787 | 0.831069 | 0.834169  | Diffusion         |
| F4          | 0.779614                        | 0.815357 | 0.844089 | 0.884511  | Diffusion         |
| F5          | 0.799451                        | 0.845187 | 0.876062 | 0.89952   | Diffusion         |
| F6          | 0.806757                        | 0.854415 | 0.884397 | 0.904771  | Diffusion         |
| F7          | 0.753357                        | 0.78001  | 0.804955 | 0.861196  | Diffusion         |
| F8          | 0.793695                        | 0.830608 | 0.859167 | 0.895067  | Diffusion         |
| F9          | 0.772838                        | 0.824903 | 0.86315  | 0.881514  | Diffusion         |

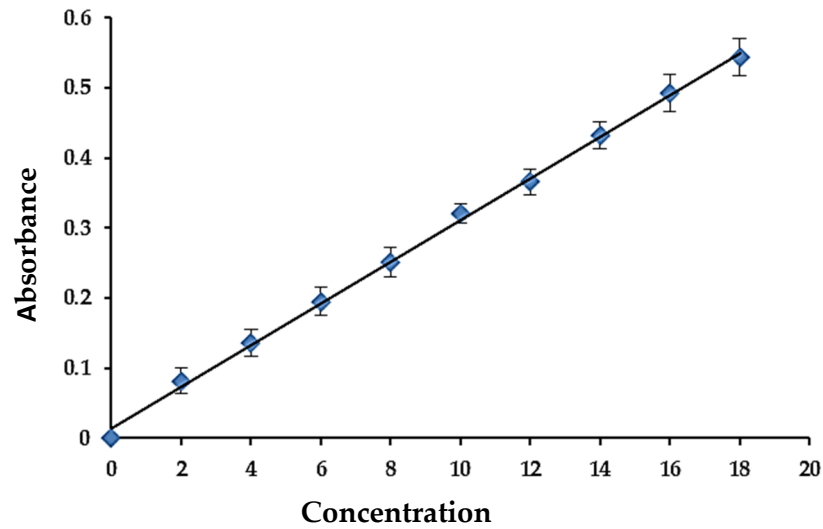

**Figure S1.** Calibration curve of LUT in PBS, pH 7.4 (Mean  $\pm$  SD,  $n = 3$ ).

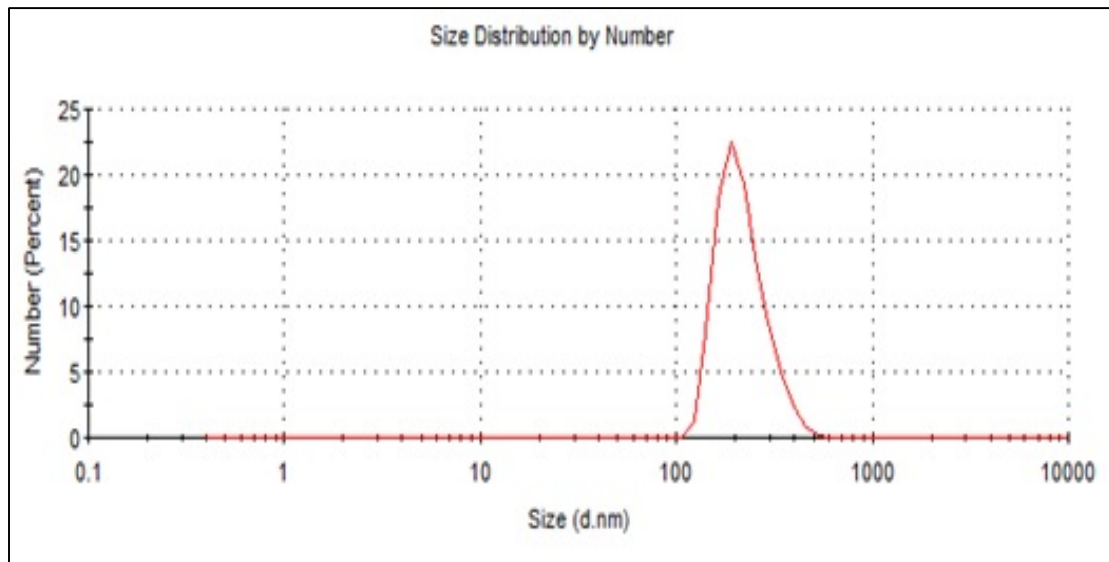

**Figure S2.** Vesicle size of the selected LUT loaded ethosomal formulation (F8).

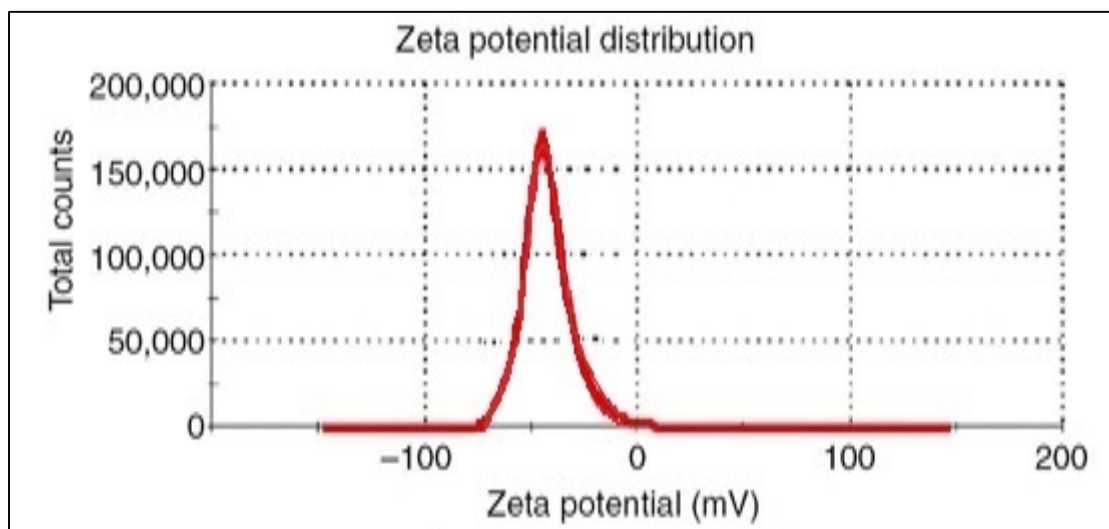

**Figure S3.** Zeta potential of the selected ethosomal formulation (F8).
